# Supplementary material for: A new type of germanium–vanadate cluster, [Ge5V6O21(heda)6] (Hheda = N-(2-hydroxyethyl)ethylenediamine)
Source: Royal Society of Chemistry journal article supplement (doi:10.1039/c3ce26726a), 2013-01-01
Supplement: c3ce26726a.pdf [file c3ce26726a.pdf]

## Supporting Information for:

A new type germanium-vanadate cluster,  $[\text{Ge}_5\text{V}_6\text{O}_{21}(\text{heda})_6]$  (Hheda = *N*-(2-hydroxyethyl)ethylenediamine)

Li-Sheng You, Qin-Yu Zhu, Xiang Zhang, Ya-Yang Pu,<sup>†</sup> Guo-Qing Bian, and Jie Dai

### 1. Figures

**Fig. S1.** IR spectrum of compound **1**.

**Fig. S2.** XRD patterns for the experimental and calculated results of compound **1**.

**Fig. S3.** EPR result of compound **1**.

**Fig. S4.** TG curve for compound **1**.

**Fig. S5.** The XRD patterns of the dehydrated sample of compound **1** along with the original one.

**2. Table S1** Selected bond lengths(Å) and angles (°).

## 1. Figures

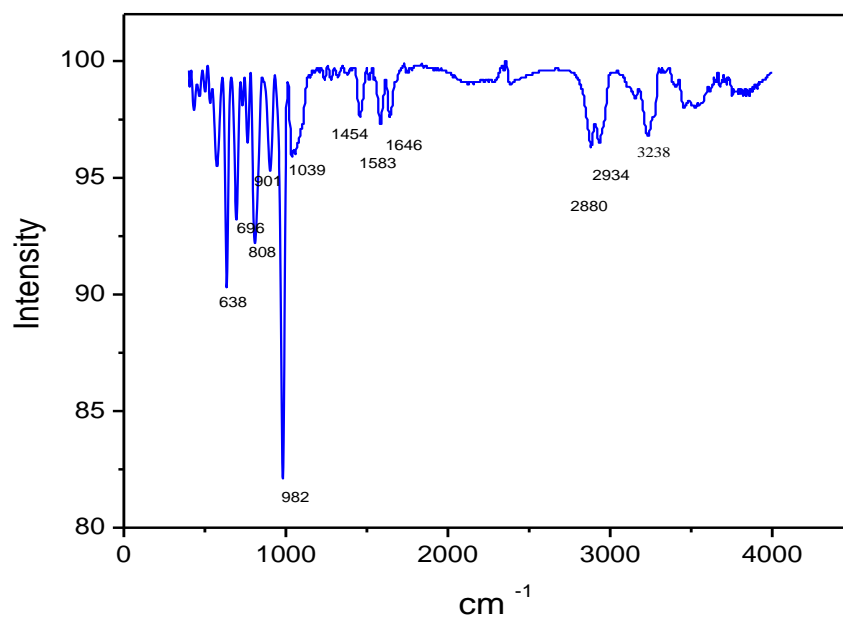

**Fig. S1.** IR spectrum of compound 1..

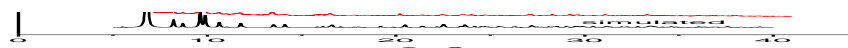

**Fig. S2.** XRD patterns for the experimental and calculated results of compound 1 to ensure their phase purity.

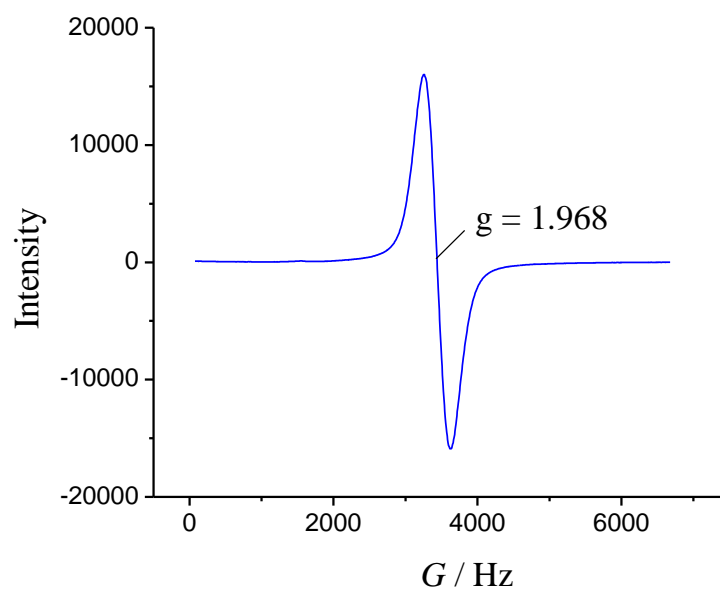

**Fig. S3.** EPR result of compound **1**.

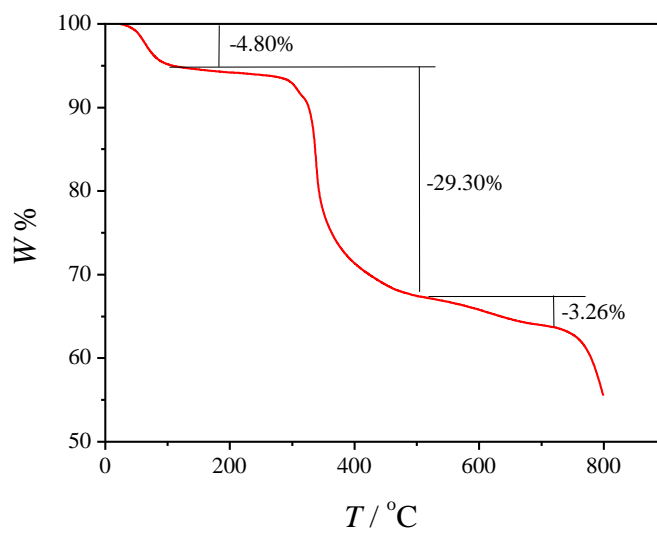

**Fig. S4.** TG curve for compound **1**.

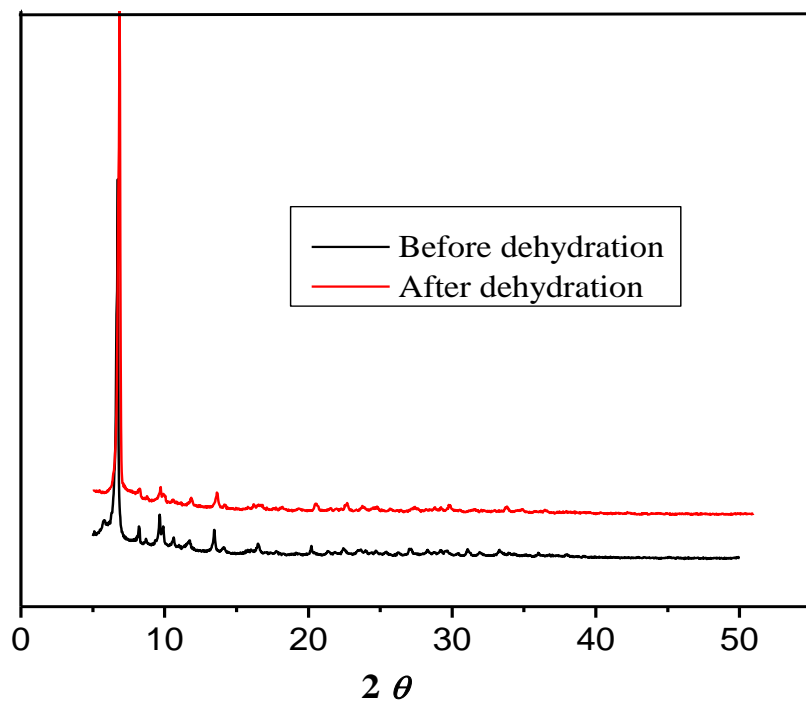

**Fig. S5.** The XRD patterns of the dehydrated sample of compound **1** along with the original one.

## 2. Table

**Table S1** Selected bond lengths(Å) and angles (°).

| Bond lengths (Å) |          |            |          |             |          |
|------------------|----------|------------|----------|-------------|----------|
| Ge1—O3           | 1.730(6) | Ge1—O5     | 1.727(7) | Ge1—O7      | 1.737(7) |
| Ge1—O17          | 1.752(8) | Ge2—O4     | 1.772(7) | Ge2—O8      | 1.760(6) |
| Ge2—O9           | 1.733(7) | Ge2—O23    | 1.743(8) | Ge3—O1      | 1.728(6) |
| Ge3—O4           | 1.786(8) | Ge3—O12    | 1.765(7) | Ge3—O21     | 1.733(8) |
| Ge4—O2           | 1.888(7) | Ge4—O3     | 1.831(7) | Ge4—O6      | 1.853(7) |
| Ge4—O27          | 1.867(8) | Ge4—N5     | 2.105(9) | Ge4—N6      | 2.03(1)  |
| Ge5—O7           | 1.850(6) | Ge5—O10    | 1.872(7) | Ge5—O13     | 1.884(7) |
| Ge5—O28          | 1.867(8) | Ge5—N11    | 2.090(9) | Ge5—N12     | 2.050(9) |
| V1—O5            | 2.235(7) | V1—O10     | 1.937(7) | V1—O11      | 1.609(8) |
| V1—O12           | 2.029(7) | V1—O14     | 2.030(7) | V1—O25      | 2.15(1)  |
| V2—O1            | 2.300(7) | V2—O2      | 1.966(7) | V2—O5       | 1.957(7) |
| V2—O14           | 1.963(8) | V2—O15     | 1.609(8) | V2—N7       | 2.17(1)  |
| V3—O9            | 1.974(8) | V3—O10     | 1.946(7) | V3—O12      | 1.999(7) |
| V3—O13           | 1.954(7) | V3—O18     | 1.618(8) | V4—O1       | 1.962(7) |
| V4—O2            | 1.961(7) | V4—O6      | 1.948(7) | V4—O8       | 2.001(7) |
| V4—O19           | 1.603(7) | V5—O9      | 2.294(8) | V5—O13      | 1.983(8) |
| V5—O16           | 1.615(8) | V5—O17     | 1.955(7) | V5—O20      | 1.962(7) |
| V5—N1            | 2.19(1)  | V6—O6      | 1.945(7) | V6—O8       | 2.053(7) |
| V6—O17           | 2.247(7) | V6—O20     | 1.995(7) | V6—O22      | 1.614(8) |
| V6—O24           | 2.16(1)  |            |          |             |          |
| angles (°)       |          |            |          |             |          |
| O5—V1—O10        | 86.2(3)  | O5—V1—O12  | 83.3(3)  | O5—V1—O14   | 71.9(3)  |
| O1—V2—N7         | 82.3(3)  | O2—V2—N7   | 98.6(3)  | O14—V2—N7   | 80.0(4)  |
| O1—V2—O2         | 73.5(3)  | O1—V2—O5   | 82.4(3)  | O1—V2—O14   | 82.6(3)  |
| O9—V3—O12        | 97.1(3)  | O9—V3—O13  | 81.1(3)  | O9—V3—O18   | 108.5(4) |
| O1—V4—O2         | 81.8(3)  | O2—V4—O6   | 75.9(3)  | O6—V4—O8    | 80.9(3)  |
| O9—V5—O13        | 72.9(3)  | O9—V5—N1   | 81.6(3)  | O13—V5—N1   | 102.4(3) |
| O6—V6—O8         | 79.7(3)  | O3—Ge1—O5  | 109.0(3) | O3—Ge1—O7   | 112.9(3) |
| O3—Ge1—O17       | 106.5(3) | O4—Ge2—O8  | 105.2(3) | O4—Ge2—O9   | 107.6(3) |
| O8—Ge2—O9        | 115.8(3) | O1—Ge3—O4  | 108.5(3) | O1—Ge3—O12  | 113.0(3) |
| O4—Ge3—O12       | 104.7(3) | O2—Ge4—O3  | 100.2(3) | O2—Ge4—O6   | 79.9(3)  |
| O3—Ge4—O27       | 90.9(3)  | O2—Ge4—N5  | 87.1(3)  | O2—Ge4—N6   | 89.1(3)  |
| N5—Ge4—N6        | 82.0(4)  | O7—Ge5—N11 | 166.8(3) | N11—Ge5—N12 | 81.9(4)  |

**Table S2** X···Y distances of hydrogen bonds (Å).\*

|                |       |               |       |            |       |
|----------------|-------|---------------|-------|------------|-------|
| N2···O29w      | 2.865 | N4···O11      | 2.710 | N5···O31w  | 2.863 |
| N6···O4        | 2.913 | N6···O15 (in) | 2.970 | N10···O30w | 2.946 |
| N10···O31w     | 2.806 | N12···O7      | 2.990 | N12···O29w | 2.932 |
| N12···O16 (in) | 3.015 | O29w···O23    | 2.669 | O30w···O23 | 2.856 |
| O31w···O18     | 2.886 | O31w···O19    | 2.773 |            |       |

\* Because the hydrogen atoms of the water and the amine groups can not be located, only the X···Y distances' are listed.

w: oxygen of water; in: intra-cluster
